# Supplementary material for: Tailored modulation of S100A1 and RASSF8 expression by butanediamide augments healing of rotator cuff tears
Source: PeerJ. 2023 Aug 14;11:e15791. doi: 10.7717/peerj.15791 (PMC10434103; doi:10.7717/peerj.15791)
Supplement: Supplemental Information 1 [file peerj-11-15791-s001.xlsx]

## Sheet: MH7A
CCK8
Days	si-NC			si-S100A1
	sample 1	sample 2	sample 3	sample 1	sample 2	sample 3
0	0.513	0.481	0.484	0.586	0.452	0.478
1	0.637	0.529	0.626	0.655	0.619	0.517
2	0.856	0.732	0.746	0.927	1.068	0.831
3	1.035	0.945	1.138	1.304	1.457	1.498
4	1.334	1.46	1.438	1.702	2.02	1.837
