# Supplementary material for: Tailored modulation of S100A1 and RASSF8 expression by butanediamide augments healing of rotator cuff tears
Source: PeerJ journal article supplement (doi:10.7717/peerj.15791), 2023-08-14

A

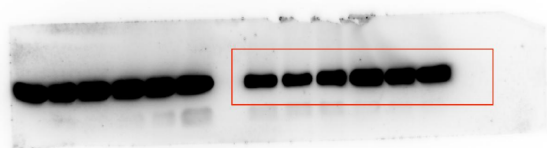

GAPDH

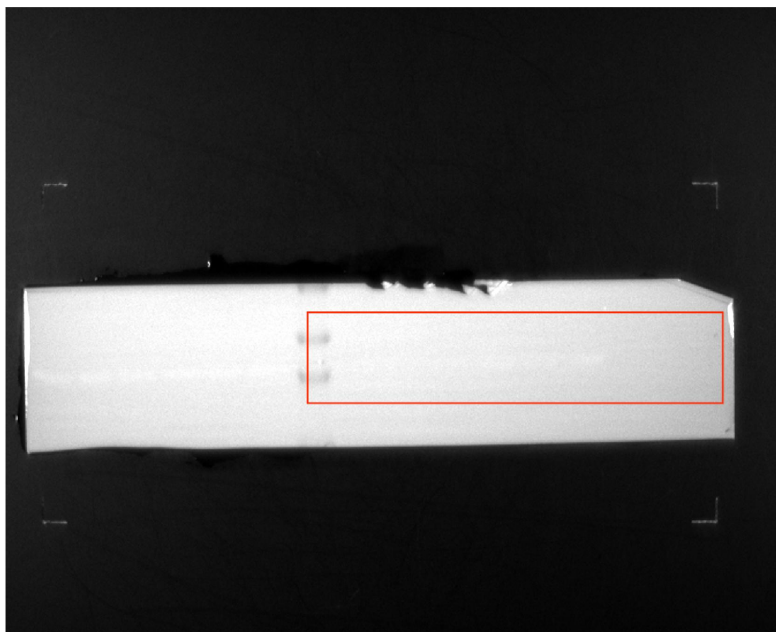

B

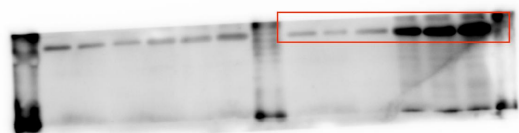

S100A1

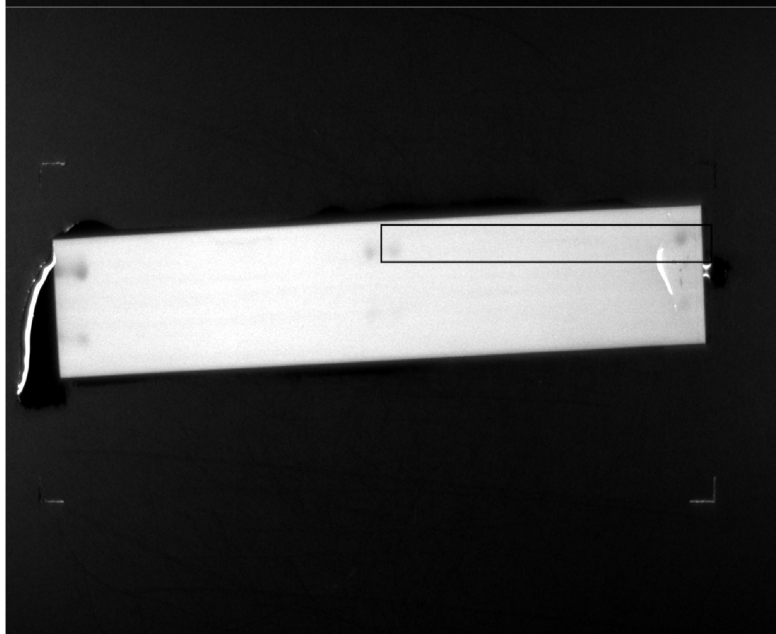

Supplement: UncroppedGelsBlots.pdf [file UncroppedGelsBlots.pdf]
